# Supplementary material
Source: PubMed Central journal article supplement (PMC1518697)
Supplement: pmed.0030232.st001.pdf [file pmed.0030232.st001.pdf]

The number of samples closest to each mouse development stage within each lung sample type based on 3590 homolog gene set, 1148 gene set and 596 gene set.

| The # of closest samples calculated based on the 3590 human mouse homologs | E12 | E14 | E16 | E18 | P1 | P4 | P7 | P10 | P14 | P21 |
|----------------------------------------------------------------------------|-----|-----|-----|-----|----|----|----|-----|-----|-----|
| COID                                                                       | 8   | 5   | 0   | 2   | 0  | 0  | 0  | 5   | 0   | 0   |
| SCLC                                                                       | 4   | 2   | 0   | 0   | 0  | 0  | 0  | 0   | 0   | 0   |
| SQ                                                                         | 0   | 14  | 6   | 0   | 0  | 1  | 0  | 0   | 0   | 0   |
| AD                                                                         | 6   | 29  | 29  | 4   | 0  | 71 | 0  | 0   | 0   | 0   |
| NL                                                                         | 0   | 0   | 1   | 0   | 2  | 14 | 0  | 0   | 0   | 0   |

| The # of closest samples calculated based on the 1148 human mouse homologs | E12 | E14 | E16 | E18 | P1 | P4 | P7 | P10 | P14 | P21 |
|----------------------------------------------------------------------------|-----|-----|-----|-----|----|----|----|-----|-----|-----|
| COID                                                                       | 12  | 6   | 0   | 0   | 0  | 0  | 0  | 2   | 0   | 0   |
| SCLC                                                                       | 4   | 2   | 0   | 0   | 0  | 0  | 0  | 0   | 0   | 0   |
| SQ                                                                         | 1   | 19  | 1   | 0   | 0  | 0  | 0  | 0   | 0   | 0   |
| AD                                                                         | 2   | 92  | 29  | 2   | 0  | 14 | 0  | 0   | 0   | 0   |
| NL                                                                         | 0   | 0   | 1   | 0   | 0  | 15 | 0  | 1   | 0   | 0   |

| The # of closest samples calculated based on the 596 human mouse homologs | E12 | E14 | E16 | E18 | P1 | P4 | P7 | P10 | P14 | P21 |
|---------------------------------------------------------------------------|-----|-----|-----|-----|----|----|----|-----|-----|-----|
| COID                                                                      | 19  | 1   | 0   | 0   | 0  | 0  | 0  | 0   | 0   | 0   |
| SCLC                                                                      | 6   | 0   | 0   | 0   | 0  | 0  | 0  | 0   | 0   | 0   |
| SQ                                                                        | 17  | 4   | 0   | 0   | 0  | 0  | 0  | 0   | 0   | 0   |
| AD                                                                        | 37  | 86  | 13  | 0   | 0  | 3  | 0  | 0   | 0   | 0   |
| NL                                                                        | 0   | 0   | 1   | 0   | 0  | 16 | 0  | 0   | 0   | 0   |
