# Supplementary material
Source: PubMed Central journal article supplement (PMC1518697)
Supplement: pmed.0030232.st003.pdf [file pmed.0030232.st003.pdf]

The scores for top-union algorithm in action; N is the number of top genes from each lung cancer subtype's significantly differentiated genes; ad\_cn is the average distance between centroids of cancer subtypes and normal lung; ad\_cc is the average distance between centroids of the closest pairs of cancer subtypes; t is the average tightness of cancer subtypes computed as the area of the convex hull of the human sample points divided by the number of samples in the subtype; n\_ovlp, the number of overlapping sample points between different cancer subtypes – for each pair of distinct subtypes, we count the number of samples located in the intersection of the corresponding two convex hulls.

| N   | Score | ad_cn  | ad_cc  | t    | n_ovlp |
|-----|-------|--------|--------|------|--------|
| 100 | 44    | 194.66 | 47.8   | 0.95 | 172    |
| 110 | 57    | 216.93 | 53.1   | 0.73 | 148    |
| 120 | 58    | 218.54 | 54.06  | 1.37 | 142    |
| 130 | 61    | 282.91 | 82.52  | 3.2  | 90     |
| 140 | 62    | 281.89 | 83.39  | 2.46 | 91     |
| 150 | 64    | 429.11 | 123.8  | 2.32 | 140    |
| 160 | 57    | 539.63 | 161.67 | 1.2  | 167    |
| 170 | 50    | 579.14 | 170.5  | 1.32 | 178.5  |
| 180 | 55    | 588.28 | 172.39 | 1.48 | 175.5  |
| 190 | 62    | 599.51 | 179.69 | 0.86 | 176    |
| 200 | 62    | 622.99 | 188.78 | 3.23 | 154.5  |
| 210 | 84    | 675.08 | 204.22 | 2.8  | 141.5  |
| 220 | 104   | 796.71 | 244.64 | 3.64 | 137.5  |
| 230 | 103   | 879.49 | 270.39 | 4.9  | 144    |
| 240 | 79    | 701.85 | 227.77 | 4.32 | 153    |
| 250 | 89    | 736.76 | 241.7  | 3.8  | 149    |
| 260 | 86    | 760.68 | 250.34 | 6.54 | 146    |
| 270 | 83    | 754.53 | 247.6  | 6.16 | 151    |
| 280 | 89    | 774.79 | 253.11 | 6.2  | 147    |
| 290 | 54    | 649.07 | 235.85 | 6.49 | 210    |
| 300 | 46    | 639.71 | 227.84 | 7.12 | 210    |
| 310 | 41    | 646.34 | 226.03 | 8.48 | 219    |
| 320 | 52    | 683.1  | 239.88 | 8.89 | 209    |
| 330 | 44    | 637.69 | 220.38 | 8.56 | 177    |
| 340 | 40    | 598.43 | 203.05 | 7.51 | 173    |
| 350 | 52    | 579.97 | 194.76 | 5.57 | 166    |
| 360 | 59    | 632.8  | 211.38 | 5.58 | 166    |
| 370 | 55    | 658.53 | 222.57 | 5.37 | 214.5  |
| 380 | 48    | 629    | 214.01 | 5.98 | 180.5  |
| 390 | 65    | 704.97 | 235.01 | 6.1  | 177    |
| 400 | 79    | 779.66 | 260.55 | 6.98 | 170.5  |
